# Supplementary material for: Transcriptomic Analysis Reveals Transcription Factors Related to Leaf Anthocyanin Biosynthesis in Paeonia qiui
Source: PubMed Central journal article supplement (PMC6149671; doi:10.3390/molecules22122186), 2017-12-08
Supplement: molecules-22-02186-s001.pdf [file molecules-22-02186-s001.pdf]

# Transcriptomic analysis reveals transcription factors related to leaf anthocyanin biosynthesis in *Paeonia qiui*

Jianrang Luo<sup>1,2</sup>, Jingjing Duan<sup>1,2</sup>, Dan Huo<sup>1,2</sup>, Qianqian Shi<sup>1,2</sup>, Lixin Niu<sup>1,2,\*</sup> and Yanlong Zhang<sup>1,2,\*</sup>

<sup>1</sup> College of Landscape Architecture and Art, Northwest A&F University, Yangling 712100, Shaanxi, China

<sup>2</sup> National Engineering Research Center for Oil Peony, Yangling 712100, Shaanxi, China

\* Correspondence: niulixin@nwafu.edu.cn; zhangyanlong@nwafu.edu.cn; Tel: +86-029-87082878

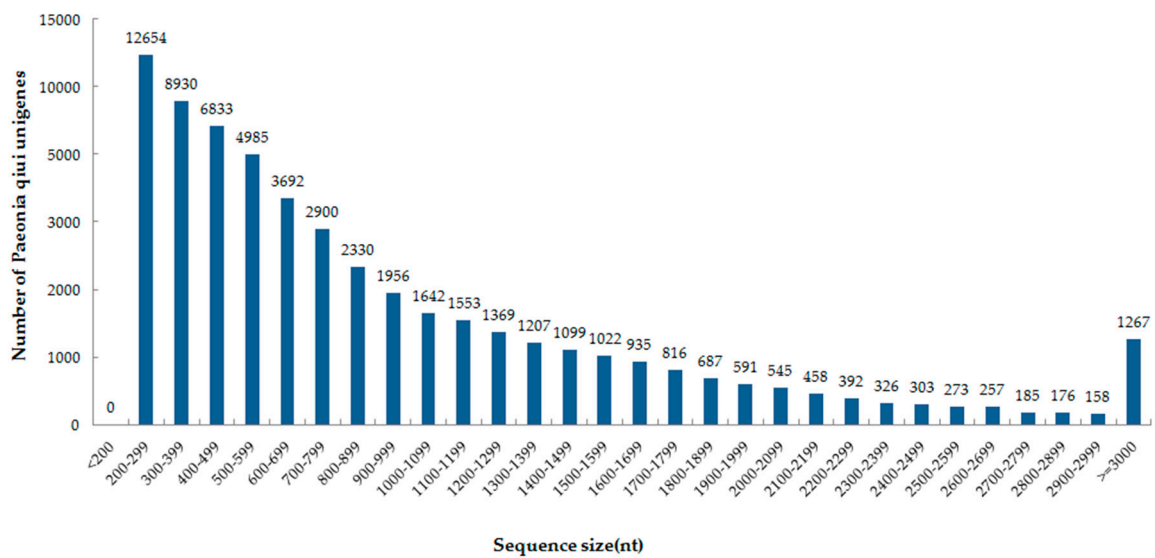

Figure S1: Size distribution of unigenes

Table S1. Primers used for q-PCR analysis

| Gene ID        | Forward primer (5'–3') | Reverse primer (5'–3') |
|----------------|------------------------|------------------------|
| Unigene0006146 | TCCTCACTTCGCAAATCCTCC  | TCAACCACACCCCTCTCCACA  |
| Unigene0005081 | GCTTCAATCCTTACCGATACA  | TCAATCAAACATCCCGCTCT   |
| Unigene0024459 | GCTGTAGATTGAGGTGGTTGA  | TCTTCTTGTGTAGGTGTGTGT  |
| Unigene0050761 | TTGACCCTAATAACCATCGCC  | TCAAGATTCAAGTCAAGCGAG  |
| Unigene0054556 | CATAATCTCGCTATCTCATCC  | GCATAATTCTCCTTCTCCTCC  |
| Unigene0052849 | TCCACAACCTGAATTGGCACT  | CAGCCCAGTTACCTTCTTTCC  |
| Unigene0017118 | CTGCTATCATCATTGGTTCCG  | GTCGCTTGTAGTTTTTCGGGT  |
| Unigene0016797 | CTATTCTTTTCACACAGACACC | TGCTTCCCTATGATCGACTCC  |
| Unigene0030889 | TTCATCGGTTTCATGGCTTGTC | CTCTCCGCACAGTTTTAGCC   |
| Unigene0012475 | ACCAGCATCACCAACATCTTC  | GCATATTTCTCCTTCTCTTCC  |
| Unigene0014577 | TTGCTTCTTGGCCCTACTTTG  | GTCCTCGGTTATGGTTTGTCT  |
| Unigene0041187 | GATGTTGATAGCGAGGGTGG   | AGGAAGGGGAGATTTGGGAG   |
| Unigene0040486 | ATGGCTGGTCCTTCACTTACT  | CGAAATGGATATGGAACCTGA  |

Table S2. KEGG pathway enrichment of differentially expressed genes

| No. | Pathway                                               | DEGs genes with pathway<br>annotation (2333) |          | All genes with pathway<br>annotation (6335) |         | <i>p</i> -value       | Pathway ID |
|-----|-------------------------------------------------------|----------------------------------------------|----------|---------------------------------------------|---------|-----------------------|------------|
| 1   | Ribosome                                              | 248                                          | (10.63%) | 521                                         | (8.22%) | $9.81 \times 10^{-8}$ | ko03010    |
| 2   | Phenylpropanoid biosynthesis                          | 81                                           | (3.47%)  | 143                                         | (2.26%) | $8.74 \times 10^{-7}$ | ko00940    |
| 3   | Plant hormone signal transduction                     | 113                                          | (4.84%)  | 227                                         | (3.58%) | $3.36 \times 10^{-5}$ | ko04075    |
| 4   | Starch and sucrose metabolism                         | 129                                          | (5.53%)  | 266                                         | (4.20%) | $4.64 \times 10^{-5}$ | ko00500    |
| 5   | Linoleic acid metabolism                              | 19                                           | (0.81%)  | 25                                          | (0.39%) | $7.50 \times 10^{-5}$ | ko00591    |
| 6   | DNA replication                                       | 48                                           | (2.06%)  | 84                                          | (1.33%) | 0.000109739           | ko03030    |
| 7   | Nitrogen metabolism                                   | 29                                           | (1.24%)  | 45                                          | (0.71%) | 0.00014794            | ko00910    |
| 8   | Pentose and glucuronate interconversions              | 57                                           | (2.44%)  | 108                                         | (1.70%) | 0.000472719           | ko00040    |
| 9   | Stilbenoid, diarylheptanoid and gingerol biosynthesis | 17                                           | (0.73%)  | 24                                          | (0.38%) | 0.000731129           | ko00945    |
| 10  | Terpenoid backbone biosynthesis                       | 41                                           | (1.76%)  | 74                                          | (1.17%) | 0.000814305           | ko00900    |
| 11  | Glycine, serine and threonine metabolism              | 48                                           | (2.06%)  | 90                                          | (1.42%) | 0.000955863           | ko00260    |
| 12  | Plant-pathogen interaction                            | 110                                          | (4.71%)  | 238                                         | (3.76%) | 0.001548023           | ko04626    |
| 13  | Fatty acid elongation                                 | 25                                           | (1.07%)  | 42                                          | (0.66%) | 0.002246963           | ko00062    |
| 14  | Cyanoamino acid metabolism                            | 39                                           | (1.67%)  | 73                                          | (1.15%) | 0.002667798           | ko00460    |
| 15  | Galactose metabolism                                  | 42                                           | (1.80%)  | 80                                          | (1.26%) | 0.002878465           | ko00052    |
| 16  | Monoterpenoid biosynthesis                            | 9                                            | (0.39%)  | 11                                          | (0.17%) | 0.003047899           | ko00902    |
| 17  | Flavonoid biosynthesis                                | 25                                           | (1.07%)  | 43                                          | (0.68%) | 0.003510991           | ko00941    |
| 18  | Sesquiterpenoid and triterpenoid biosynthesis         | 15                                           | (0.64%)  | 23                                          | (0.36%) | 0.005251659           | ko00909    |
| 19  | alpha-Linolenic acid metabolism                       | 32                                           | (1.37%)  | 60                                          | (0.95%) | 0.00643939            | ko00592    |
| 20  | Glutathione metabolism                                | 51                                           | (2.19%)  | 110                                         | (1.74%) | 0.02429231            | ko00480    |
| 21  | Biotin metabolism                                     | 13                                           | (0.56%)  | 22                                          | (0.35%) | 0.02770014            | ko00780    |
| 22  | Carotenoid biosynthesis                               | 21                                           | (0.90%)  | 40                                          | (0.63%) | 0.03062768            | ko00906    |
| 23  | Fatty acid metabolism                                 | 45                                           | (1.93%)  | 99                                          | (1.56%) | 0.04693405            | ko01212    |
| 24  | Flavone and flavonol biosynthesis                     | 3                                            | (0.13%)  | 3                                           | (0.05%) | 0.04990584            | ko00944    |

| No. | Pathway                                                | DEGs genes with pathway |         | All genes with pathway |         | <i>p</i> -value | Pathway ID |
|-----|--------------------------------------------------------|-------------------------|---------|------------------------|---------|-----------------|------------|
|     |                                                        | annotation (2333)       | (%)     | annotation (6335)      | (%)     |                 |            |
| 25  | Synthesis and degradation of ketone bodies             | 6                       | (0.26%) | 9                      | (0.14%) | 0.06793747      | ko00072    |
| 26  | Phenylalanine metabolism                               | 24                      | (1.03%) | 50                     | (0.79%) | 0.06874378      | ko00360    |
| 27  | Zeatin biosynthesis                                    | 10                      | (0.43%) | 18                     | (0.28%) | 0.08202637      | ko00908    |
| 28  | Alanine, aspartate and glutamate metabolism            | 30                      | (1.29%) | 66                     | (1.04%) | 0.09248293      | ko00250    |
| 29  | Tropane, piperidine and pyridine alkaloid biosynthesis | 17                      | (0.73%) | 35                     | (0.55%) | 0.1034937       | ko00960    |
| 30  | Taurine and hypotaurine metabolism                     | 7                       | (0.30%) | 12                     | (0.19%) | 0.1079198       | ko00430    |
| 31  | Fatty acid biosynthesis                                | 23                      | (0.99%) | 50                     | (0.79%) | 0.1153628       | ko00061    |
| 32  | Diterpenoid biosynthesis                               | 14                      | (0.60%) | 29                     | (0.46%) | 0.1387011       | ko00904    |
| 33  | Isoquinoline alkaloid biosynthesis                     | 14                      | (0.60%) | 29                     | (0.46%) | 0.1387011       | ko00950    |
| 34  | Degradation of aromatic compounds                      | 8                       | (0.34%) | 15                     | (0.24%) | 0.1451353       | ko01220    |
| 35  | Tyrosine metabolism                                    | 26                      | (1.11%) | 59                     | (0.93%) | 0.1532415       | ko00350    |
| 36  | Phenylalanine, tyrosine and tryptophan biosynthesis    | 26                      | (1.11%) | 59                     | (0.93%) | 0.1532415       | ko00400    |
| 37  | Inositol phosphate metabolism                          | 33                      | (1.41%) | 77                     | (1.22%) | 0.1622349       | ko00562    |
| 38  | Glyoxylate and dicarboxylate metabolism                | 51                      | (2.19%) | 123                    | (1.94%) | 0.1629265       | ko00630    |
| 39  | Pentose phosphate pathway                              | 36                      | (1.54%) | 85                     | (1.34%) | 0.1707624       | ko00030    |
| 40  | Phosphatidylinositol signaling system                  | 32                      | (1.37%) | 75                     | (1.18%) | 0.1747285       | ko04070    |
| 41  | Base excision repair                                   | 31                      | (1.33%) | 73                     | (1.15%) | 0.188132        | ko03410    |
| 42  | Cysteine and methionine metabolism                     | 57                      | (2.44%) | 140                    | (2.21%) | 0.1901492       | ko00270    |
| 43  | Homologous recombination                               | 35                      | (1.50%) | 84                     | (1.33%) | 0.2075322       | ko03440    |
| 44  | Limonene and pinene degradation                        | 4                       | (0.17%) | 7                      | (0.11%) | 0.2309155       | ko00903    |
| 45  | Mismatch repair                                        | 29                      | (1.24%) | 70                     | (1.10%) | 0.2471647       | ko03430    |
| 46  | Endocytosis                                            | 98                      | (4.20%) | 251                    | (3.96%) | 0.2485607       | ko04144    |
| 47  | Biosynthesis of unsaturated fatty acids                | 21                      | (0.90%) | 50                     | (0.79%) | 0.2671184       | ko01040    |
| 48  | Fatty acid degradation                                 | 22                      | (0.94%) | 53                     | (0.84%) | 0.2827942       | ko00071    |
| 49  | Tryptophan metabolism                                  | 12                      | (0.51%) | 28                     | (0.44%) | 0.3159318       | ko00380    |
| 50  | Ascorbate and aldarate metabolism                      | 22                      | (0.94%) | 54                     | (0.85%) | 0.3204958       | ko00053    |

| No. | Pathway                                       | DEGs genes with pathway |         | All genes with pathway |         | <i>p</i> -value | Pathway ID |
|-----|-----------------------------------------------|-------------------------|---------|------------------------|---------|-----------------|------------|
|     |                                               | annotation (2333)       | (%)     | annotation (6335)      | (%)     |                 |            |
| 51  | Ether lipid metabolism                        | 18                      | (0.77%) | 44                     | (0.69%) | 0.3382354       | ko00565    |
| 52  | Carbon fixation in photosynthetic organisms   | 56                      | (2.40%) | 145                    | (2.29%) | 0.3549311       | ko00710    |
| 53  | Brassinosteroid biosynthesis                  | 7                       | (0.30%) | 16                     | (0.25%) | 0.3689303       | ko00905    |
| 54  | Steroid biosynthesis                          | 15                      | (0.64%) | 37                     | (0.58%) | 0.3776071       | ko00100    |
| 55  | Circadian rhythm - plant                      | 17                      | (0.73%) | 43                     | (0.68%) | 0.4115331       | ko04712    |
| 56  | Monobactam biosynthesis                       | 4                       | (0.17%) | 9                      | (0.14%) | 0.437184        | ko00261    |
| 57  | Photosynthesis                                | 42                      | (1.80%) | 112                    | (1.77%) | 0.4766864       | ko00195    |
| 58  | Carbon metabolism                             | 153                     | (6.56%) | 414                    | (6.54%) | 0.4968967       | ko01200    |
| 59  | Pyrimidine metabolism                         | 67                      | (2.87%) | 181                    | (2.86%) | 0.5072089       | ko00240    |
| 60  | Thiamine metabolism                           | 8                       | (0.34%) | 21                     | (0.33%) | 0.5340385       | ko00730    |
| 61  | Butanoate metabolism                          | 8                       | (0.34%) | 21                     | (0.33%) | 0.5340385       | ko00650    |
| 62  | Nucleotide excision repair                    | 35                      | (1.50%) | 95                     | (1.50%) | 0.5378195       | ko03420    |
| 63  | Glycolysis / Gluconeogenesis                  | 59                      | (2.53%) | 161                    | (2.54%) | 0.549408        | ko00010    |
| 64  | Nicotinate and nicotinamide metabolism        | 9                       | (0.39%) | 24                     | (0.38%) | 0.5495391       | ko00760    |
| 65  | Glycosphingolipid biosynthesis - globo series | 5                       | (0.21%) | 13                     | (0.21%) | 0.5552117       | ko00603    |
| 66  | Arachidonic acid metabolism                   | 6                       | (0.26%) | 16                     | (0.25%) | 0.5714135       | ko00590    |
| 67  | Cutin, suberine and wax biosynthesis          | 11                      | (0.47%) | 30                     | (0.47%) | 0.5758488       | ko00073    |
| 68  | Peroxisome                                    | 41                      | (1.76%) | 113                    | (1.78%) | 0.5836469       | ko04146    |
| 69  | Sulfur metabolism                             | 13                      | (0.56%) | 36                     | (0.57%) | 0.5978298       | ko00920    |
| 70  | Other types of O-glycan biosynthesis          | 3                       | (0.13%) | 8                      | (0.13%) | 0.6150762       | ko00514    |
| 71  | Anthocyanin biosynthesis                      | 3                       | (0.13%) | 8                      | (0.13%) | 0.6150762       | ko00942    |
| 72  | Amino sugar and nucleotide sugar metabolism   | 56                      | (2.40%) | 157                    | (2.48%) | 0.6488985       | ko00520    |
| 73  | Non-homologous end-joining                    | 5                       | (0.21%) | 15                     | (0.24%) | 0.7016185       | ko03450    |
| 74  | Isoflavonoid biosynthesis                     | 3                       | (0.13%) | 9                      | (0.14%) | 0.7040224       | ko00943    |
| 75  | Lipoic acid metabolism                        | 2                       | (0.09%) | 6                      | (0.09%) | 0.7142406       | ko00785    |
| 76  | Arginine biosynthesis                         | 19                      | (0.81%) | 56                     | (0.88%) | 0.7198241       | ko00220    |

| No. | Pathway                                    | DEGs genes with pathway |         | All genes with pathway |         | <i>p</i> -value | Pathway ID |
|-----|--------------------------------------------|-------------------------|---------|------------------------|---------|-----------------|------------|
|     |                                            | annotation (2333)       | (%)     | annotation (6335)      | (%)     |                 |            |
| 77  | Glycerophospholipid metabolism             | 43                      | (1.84%) | 124                    | (1.96%) | 0.7223482       | ko00564    |
| 78  | Protein export                             | 20                      | (0.86%) | 60                     | (0.95%) | 0.7554342       | ko03060    |
| 79  | Photosynthesis - antenna proteins          | 10                      | (0.43%) | 31                     | (0.49%) | 0.7599607       | ko00196    |
| 80  | Vitamin B6 metabolism                      | 5                       | (0.21%) | 16                     | (0.25%) | 0.7608027       | ko00750    |
| 81  | Fructose and mannose metabolism            | 31                      | (1.33%) | 92                     | (1.45%) | 0.7677863       | ko00051    |
| 82  | Glycosaminoglycan degradation              | 7                       | (0.30%) | 23                     | (0.36%) | 0.8014944       | ko00531    |
| 83  | Propanoate metabolism                      | 17                      | (0.73%) | 53                     | (0.84%) | 0.8050195       | ko00640    |
| 84  | Histidine metabolism                       | 5                       | (0.21%) | 17                     | (0.27%) | 0.8106426       | ko00340    |
| 85  | Lysine degradation                         | 13                      | (0.56%) | 42                     | (0.66%) | 0.8292116       | ko00310    |
| 86  | Sphingolipid metabolism                    | 12                      | (0.51%) | 39                     | (0.62%) | 0.8294074       | ko00600    |
| 87  | Spliceosome                                | 105                     | (4.50%) | 306                    | (4.83%) | 0.8401597       | ko03040    |
| 88  | Selenocompound metabolism                  | 6                       | (0.26%) | 21                     | (0.33%) | 0.8444504       | ko00450    |
| 89  | Pyruvate metabolism                        | 37                      | (1.59%) | 114                    | (1.80%) | 0.8590132       | ko00620    |
| 90  | Glycerolipid metabolism                    | 24                      | (1.03%) | 77                     | (1.22%) | 0.8767001       | ko00561    |
| 91  | Lysine biosynthesis                        | 5                       | (0.21%) | 19                     | (0.30%) | 0.8852201       | ko00300    |
| 92  | One carbon pool by folate                  | 8                       | (0.34%) | 29                     | (0.46%) | 0.8922036       | ko00670    |
| 93  | Riboflavin metabolism                      | 4                       | (0.17%) | 16                     | (0.25%) | 0.8960274       | ko00740    |
| 94  | Valine, leucine and isoleucine degradation | 20                      | (0.86%) | 67                     | (1.06%) | 0.9078143       | ko00280    |
| 95  | Arginine and proline metabolism            | 18                      | (0.77%) | 61                     | (0.96%) | 0.9090556       | ko00330    |
| 96  | SNARE interactions in vesicular transport  | 17                      | (0.73%) | 58                     | (0.92%) | 0.9099296       | ko04130    |
| 97  | Porphyrin and chlorophyll metabolism       | 16                      | (0.69%) | 55                     | (0.87%) | 0.9110034       | ko00860    |
| 98  | mRNA surveillance pathway                  | 57                      | (2.44%) | 178                    | (2.81%) | 0.924301        | ko03015    |
| 99  | Other glycan degradation                   | 9                       | (0.39%) | 34                     | (0.54%) | 0.9272641       | ko00511    |
| 100 | Biosynthesis of amino acids                | 105                     | (4.50%) | 317                    | (5.00%) | 0.9290205       | ko01230    |
| 101 | Ribosome biogenesis in eukaryotes          | 50                      | (2.14%) | 163                    | (2.57%) | 0.959786        | ko03008    |
| 102 | Purine metabolism                          | 70                      | (3.00%) | 222                    | (3.50%) | 0.9598967       | ko00230    |

| No. | Pathway                                               | DEGs genes with pathway |         | All genes with pathway |         | <i>p</i> -value | Pathway ID |
|-----|-------------------------------------------------------|-------------------------|---------|------------------------|---------|-----------------|------------|
|     |                                                       | annotation (2333)       | (%)     | annotation (6335)      | (%)     |                 |            |
| 103 | Glycosphingolipid biosynthesis - ganglio series       | 1                       | (0.04%) | 8                      | (0.13%) | 0.9746998       | ko00604    |
| 104 | Regulation of autophagy                               | 12                      | (0.51%) | 49                     | (0.77%) | 0.9770373       | ko04140    |
| 105 | Folate biosynthesis                                   | 4                       | (0.17%) | 21                     | (0.33%) | 0.9776331       | ko00790    |
| 106 | Pantothenate and CoA biosynthesis                     | 7                       | (0.30%) | 32                     | (0.51%) | 0.9777182       | ko00770    |
| 107 | Protein processing in endoplasmic reticulum           | 107                     | (4.59%) | 336                    | (5.30%) | 0.9782724       | ko04141    |
| 108 | beta-Alanine metabolism                               | 12                      | (0.51%) | 50                     | (0.79%) | 0.9817576       | ko00410    |
| 109 | Proteasome                                            | 18                      | (0.77%) | 71                     | (1.12%) | 0.9857748       | ko03050    |
| 110 | Valine, leucine and isoleucine biosynthesis           | 4                       | (0.17%) | 23                     | (0.36%) | 0.9884576       | ko00290    |
| 111 | C5-Branched dibasic acid metabolism                   | 1                       | (0.04%) | 10                     | (0.16%) | 0.989919        | ko00660    |
| 112 | Sulfur relay system                                   | 2                       | (0.09%) | 15                     | (0.24%) | 0.9901401       | ko04122    |
| 113 | ABC transporters                                      | 25                      | (1.07%) | 97                     | (1.53%) | 0.9925878       | ko02010    |
| 114 | Phagosome                                             | 27                      | (1.16%) | 104                    | (1.64%) | 0.993332        | ko04145    |
| 115 | RNA degradation                                       | 59                      | (2.53%) | 204                    | (3.22%) | 0.9936218       | ko03018    |
| 116 | 2-Oxocarboxylic acid metabolism                       | 17                      | (0.73%) | 72                     | (1.14%) | 0.9943988       | ko01210    |
| 117 | Glycosylphosphatidylinositol(GPI)-anchor biosynthesis | 8                       | (0.34%) | 41                     | (0.65%) | 0.9951002       | ko00563    |
| 118 | Ubiquitin mediated proteolysis                        | 60                      | (2.57%) | 211                    | (3.33%) | 0.9963919       | ko04120    |
| 119 | RNA polymerase                                        | 15                      | (0.64%) | 73                     | (1.15%) | 0.9991898       | ko03020    |
| 120 | N-Glycan biosynthesis                                 | 8                       | (0.34%) | 49                     | (0.77%) | 0.9995688       | ko00510    |
| 121 | Ubiquinone and other terpenoid-quinone biosynthesis   | 13                      | (0.56%) | 70                     | (1.10%) | 0.9997493       | ko00130    |
| 122 | Oxidative phosphorylation                             | 50                      | (2.14%) | 197                    | (3.11%) | 0.9998066       | ko00190    |
| 123 | Basal transcription factors                           | 13                      | (0.56%) | 74                     | (1.17%) | 0.9999212       | ko03022    |
| 124 | Citrate cycle (TCA cycle)                             | 13                      | (0.56%) | 75                     | (1.18%) | 0.9999413       | ko00020    |
| 125 | RNA transport                                         | 74                      | (3.17%) | 291                    | (4.59%) | 0.9999914       | ko03013    |
| 126 | Aminoacyl-tRNA biosynthesis                           | 8                       | (0.34%) | 72                     | (1.14%) | 0.9999998       | ko00970    |

Table S3. MYBs identified from differentially expressed genes

| GeneID         | log2 Ratio(S3/S1)* | Annotation                                                                    |
|----------------|--------------------|-------------------------------------------------------------------------------|
| Unigene0029523 | -12.57036964       | Myb domain protein 106 ( <i>Theobroma cacao</i> )                             |
| Unigene0057113 | -11.49290468       | transcription factor MYB108 ( <i>Vitis vinifera</i> )                         |
| Unigene0029522 | -9.970046156       | Myb domain protein 106 ( <i>Theobroma cacao</i> )                             |
| Unigene0016989 | -8.829383836       | transcription factor MYB108-like ( <i>Populus euphratica</i> )                |
| Unigene0032117 | -7.900304871       | myb-related protein Myb4-like ( <i>Populus euphratica</i> )                   |
| Unigene0032319 | -6.93164243        | myb-related protein Myb4-like ( <i>Juglans regia</i> )                        |
| Unigene0011406 | -6.137168382       | transcription repressor MYB6 isoform X1 ( <i>Theobroma cacao</i> )            |
| Unigene0025135 | -6.111096685       | transcription factor MYB48 ( <i>Vitis vinifera</i> )                          |
| Unigene0016220 | -5.263146719       | transcription factor MYB44-like ( <i>Ziziphus jujuba</i> )                    |
| Unigene0032116 | -4.832477733       | myb-related protein Myb4-like ( <i>Populus euphratica</i> )                   |
| Unigene0030529 | -3.676597687       | myb-related protein 3R-1 isoform X1 ( <i>Vitis vinifera</i> )                 |
| Unigene0047398 | -3.396310077       | transcription factor MYB3-like ( <i>Jatropha curcas</i> )                     |
| Unigene0024459 | -3.356215515       | MYB transcription factor 113 ( <i>Liquidambar formosana</i> )                 |
| Unigene0057357 | -3.23926588        | myb-related protein 308-like ( <i>Vitis vinifera</i> )                        |
| Unigene0006047 | -3.163869449       | myb-related protein 3R-1 isoform X1 ( <i>Vitis vinifera</i> )                 |
| Unigene0004419 | -2.655599465       | transcription repressor MYB6-like ( <i>Juglans regia</i> )                    |
| Unigene0021641 | -2.603584268       | myb-related protein Myb4-like ( <i>Ziziphus jujuba</i> )                      |
| Unigene0020583 | -2.448745375       | R2R3 Myb protein, partial ( <i>Zea mays</i> )                                 |
| Unigene0018062 | -2.350682055       | MYB1 protein ( <i>Paeonia suffruticosa</i> )                                  |
| Unigene0019972 | -2.028269696       | myb-related protein 3R-1-like ( <i>Ziziphus jujuba</i> )                      |
| Unigene0039186 | -1.857530006       | L10-interacting MYB domain-containing ( <i>Nicotiana attenuata</i> )          |
| Unigene0025689 | -1.517664466       | myb-related protein B-like ( <i>Juglans regia</i> )                           |
| Unigene0022939 | -1.509975137       | transcription factor MYB86-like ( <i>Gossypium hirsutum</i> )                 |
| Unigene0033907 | -1.005823383       | myb-like protein B ( <i>Vitis vinifera</i> )                                  |
| Unigene0042748 | -1.003142265       | L10-interacting MYB domain-containing ( <i>Malus domestica</i> )              |
| Unigene0020998 | -1.000574525       | R2R3-MYB transcription factor MYB2 ( <i>Epimedium sagittatum</i> )            |
| Unigene0025517 | 1.022010118        | L10-interacting MYB domain-containing ( <i>Vitis vinifera</i> )               |
| Unigene0021289 | 1.112487772        | myb-related protein 308-like ( <i>Populus euphratica</i> )                    |
| Unigene0050761 | 1.144656074        | transcription repressor MYB6 ( <i>Ricinus communis</i> )                      |
| Unigene0025266 | 1.242155836        | MYB transcription factor R2R3-like ( <i>Populus tremuloides</i> )             |
| Unigene0027334 | 2.45635767         | MYB61 protein ( <i>Betula platyphylla</i> )                                   |
| Unigene0050423 | 2.477964054        | transcription factor MYB46-like ( <i>Populus euphratica</i> )                 |
| Unigene0015505 | 2.615240635        | Myb DNA-binding domain-containing ( <i>Cephalotus follicularis</i> )          |
| Unigene0050035 | 3.121526809        | myb-related protein Hv33 ( <i>Ipomoea nil</i> )                               |
| Unigene0009193 | 3.582518158        | MYB-like 102 ( <i>Theobroma cacao</i> )                                       |
| Unigene0015506 | 3.63032412         | myb-related protein 306-like ( <i>Gossypium raimondii</i> )                   |
| Unigene0058209 | 3.7291144          | transcription factor MYB82 ( <i>Vitis vinifera</i> )                          |
| Unigene0057664 | 5.385523072        | Myb_DNA-binding domain-containing ( <i>Cephalotus follicularis</i> )          |
| Unigene0057665 | 10.45703881        | Myb_DNA-binding domain-containing ( <i>Cephalotus follicularis</i> )          |
| Unigene0009481 | 10.88310146        | MYB transcriptional factor ( <i>Populus tremula</i> × <i>P. tremuloides</i> ) |

\* Data were the mean value of three biological replicates.



Table S4. bHLHs identified from differentially expressed genes

| GeneID         | log2 Ratio(S3/S1) | Annotation                                                                         |
|----------------|-------------------|------------------------------------------------------------------------------------|
| Unigene0000604 | -1.542977885      | transcription factor bHLH140 ( <i>Citrus sinensis</i> )                            |
| Unigene0000838 | -1.184189305      | transcription factor bHLH69 isoform X2 ( <i>Vitis vinifera</i> )                   |
| Unigene0004951 | -2.253690822      | transcription factor bHLH68-like ( <i>Juglans regia</i> )                          |
| Unigene0005046 | -5.824634604      | transcription factor bHLH94-like ( <i>Juglans regia</i> )                          |
| Unigene0009283 | -1.356731517      | bHLH transcription factor ( <i>Paeonia suffruticosa</i> )                          |
| Unigene0009299 | 3.01694928        | transcription factor bHLH63 ( <i>Vitis vinifera</i> )                              |
| Unigene0009765 | -11.03103489      | transcription factor bHLH93-like ( <i>Juglans regia</i> )                          |
| Unigene0010263 | 1.190472009       | transcription factor bHLH14 ( <i>Theobroma cacao</i> )                             |
| Unigene0011997 | -1.239357047      | transcription factor bHLH104 isoform X1 ( <i>Citrus sinensis</i> )                 |
| Unigene0021524 | -10.39934147      | transcription factor MYC4 ( <i>Vitis vinifera</i> )                                |
| Unigene0021927 | 2.310369042       | transcription factor bHLH36 ( <i>Theobroma cacao</i> )                             |
| Unigene0022043 | -2.507522348      | transcription factor bHLH68 ( <i>Ricinus communis</i> )                            |
| Unigene0022455 | -4.607713173      | transcription factor bHLH35-like ( <i>Pyrus × bretschneideri</i> )                 |
| Unigene0023097 | -3.228124521      | transcription factor bHLH87 ( <i>Theobroma cacao</i> )                             |
| Unigene0023465 | -1.040981906      | transcription factor bHLH113 isoform X1 ( <i>Prunus mume</i> )                     |
| Unigene0024528 | -1.817136179      | basic helix-loop-helix 144-like protein transcript variant 1 ( <i>Morus alba</i> ) |
| Unigene0024541 | -1.430788575      | transcription factor bHLH74 isoform X2 ( <i>Prunus mume</i> )                      |
| Unigene0025130 | 2.04495838        | transcription factor bHLH117 ( <i>Vitis vinifera</i> )                             |
| Unigene0027604 | -9.020557667      | transcription factor bHLH92 ( <i>Juglans regia</i> )                               |
| Unigene0028208 | -1.588286752      | transcription factor bHLH51 ( <i>Vitis vinifera</i> )                              |
| Unigene0028225 | -1.066042545      | transcription factor bHLH147 isoform X1 ( <i>Vitis vinifera</i> )                  |
| Unigene0028502 | -1.456043273      | transcription factor bHLH79-like isoform X2 ( <i>Nelumbo nucifera</i> )            |
| Unigene0029775 | -5.265879952      | HLH domain-containing protein ( <i>Cephalotus follicularis</i> )                   |
| Unigene0029789 | -4.584853904      | Serine/threonine-protein kinase WNK-related ( <i>Theobroma cacao</i> )             |
| Unigene0030684 | -1.549969453      | transcription factor bHLH128-like isoform X1 ( <i>Juglans regia</i> )              |
| Unigene0031383 | 2.345274781       | BHLH transcription factor ( <i>Medicago truncatula</i> )                           |
| Unigene0034290 | -5.735383852      | transcription factor bHLH70 isoform X2 ( <i>Vitis vinifera</i> )                   |
| Unigene0034305 | -2.982852155      | transcription factor bHLH113 isoform X3 ( <i>Vitis vinifera</i> )                  |
| Unigene0036614 | -1.576885394      | transcription factor bHLH140 ( <i>Prunus mume</i> )                                |
| Unigene0036639 | -1.163393004      | transcription factor bHLH91 ( <i>Ricinus communis</i> )                            |
| Unigene0037066 | 4.11563007        | transcription factor bHLH18-like ( <i>Solanum tuberosum</i> )                      |
| Unigene0037598 | -7.711518195      | transcription factor bHLH36 ( <i>Ziziphus jujuba</i> )                             |
| Unigene0037850 | -1.050886838      | immunoglobulin A1 protease autotransporter isoform X1 ( <i>Arachis ipaensis</i> )  |
| Unigene0037852 | -1.818022021      | transcription factor bHLH25-like ( <i>Vitis vinifera</i> )                         |
| Unigene0045448 | -2.464557332      | transcription factor bHLH110 ( <i>Theobroma cacao</i> )                            |
| Unigene0050646 | -7.156893165      | transcription factor bHLH36 ( <i>Theobroma cacao</i> )                             |
| Unigene0053195 | -3.402985048      | Serine/threonine-protein kinase WNK-related isoform 1 ( <i>Theobroma cacao</i> )   |
| Unigene0056531 | -2.396829315      | transcription factor bHLH106-like isoform X2 ( <i>Juglans regia</i> )              |
| Unigene0005081 | -1.373426581      | myc anthocyanin regulatory protein isoform X1 ( <i>Vitis vinifera</i> )            |
| Unigene0027634 | -2.372379263      | transcription factor MYC2 ( <i>Vitis vinifera</i> )                                |

\* Data were the mean value of three biological replicates.

Table S5. WD40 identified from differentially expressed genes

| GeneID         | log2 Ratio(S3/S1)* | Annotation                                                                              |
|----------------|--------------------|-----------------------------------------------------------------------------------------|
| Unigene0021880 | -3.526584548       | WD repeat-containing protein 76 isoform X2 ( <i>Jatropha curcas</i> )                   |
| Unigene0038216 | -3.493187425       | WD repeat-containing protein 76 isoform X2 ( <i>Jatropha curcas</i> )                   |
| Unigene0021324 | -1.948580414       | WD repeat-containing protein 43 isoform X2 ( <i>Vitis vinifera</i> )                    |
| Unigene0042402 | -1.626752223       | WD repeat-containing protein 89 homolog ( <i>Vitis vinifera</i> )                       |
| Unigene0014003 | -1.611681795       | mitogen-activated protein kinase-binding protein 1 isoform X3 ( <i>Vitis vinifera</i> ) |
| Unigene0035053 | -1.551363637       | WD repeat-containing protein 44 isoform X1 ( <i>Cucumis melo</i> )                      |
| Unigene0032589 | -1.532298896       | WD40 domain-containing protein ( <i>Cephalotus follicularis</i> )                       |
| Unigene0005462 | -1.430489052       | WD repeat-containing protein 43 isoform X1 ( <i>Vitis vinifera</i> )                    |
| Unigene0006146 | -1.347867295       | WD40 protein ( <i>Paeonia suffruticosa</i> )                                            |
| Unigene0032023 | -1.224403755       | diphthine methyltransferase homolog isoform X1 ( <i>Prunus mume</i> )                   |
| Unigene0038786 | -1.223522782       | WD repeat-containing protein 75 ( <i>Juglans regia</i> )                                |
| Unigene0023327 | -1.205421898       | WD repeat-containing protein 3 ( <i>Vitis vinifera</i> )                                |
| Unigene0037037 | -1.185212251       | WD repeat-containing protein 44 ( <i>Nelumbo nucifera</i> )                             |
| Unigene0058895 | -1.129144023       | WD40 repeat ( <i>Macleaya cordata</i> )                                                 |
| Unigene0008400 | 1.925910111        | WD repeat-containing protein 25 ( <i>Jatropha curcas</i> )                              |

\* Data were the mean value of three biological replicates.
